# Supplementary material for: Synthetic PreImplantation Factor (PIF) prevents fetal loss by modulating LPS induced inflammatory response
Source: PubMed Central journal article supplement (PMC5507516; doi:10.1371/journal.pone.0180642), 2017-07-12
Supplement: pone.0180642.s001.pdf [file pone.0180642.s001.pdf]

| <b>Fetal Loss</b> |     |      |     |      |     |            |     |
|-------------------|-----|------|-----|------|-----|------------|-----|
| CONTROL           |     | sPIF |     | LPS  |     | LPS + sPIF |     |
| Mean              | SD  | Mean | SD  | Mean | SD  | Mean       | SD  |
| 19                | 2.3 | 7.5  | 2.6 | 74   | 3.8 | 39         | 4.6 |

| <b>Fetal weight</b> |      |       |       |       |      |            |      |
|---------------------|------|-------|-------|-------|------|------------|------|
| CONTROL             |      | sPIF  |       | LPS   |      | LPS + sPIF |      |
| Mean                | SD   | Mean  | SD    | Mean  | SD   | Mean       | SD   |
| 0.42                | 0.05 | 0.552 | 0.017 | 0.263 | 0.01 | 0.324      | 0.02 |

| <b>Placental weight</b> |       |      |       |       |       |            |      |
|-------------------------|-------|------|-------|-------|-------|------------|------|
| CONTROL                 |       | sPIF |       | LPS   |       | LPS + sPIF |      |
| Mean                    | SD    | Mean | SD    | Mean  | SD    | Mean       | SD   |
| 0.15                    | 0.037 | 0.14 | 0.034 | 0.151 | 0.011 | 0.169      | 0.04 |

| <b>Ratio Placental/Fetal weight</b> |      |           |      |           |        |            |       |
|-------------------------------------|------|-----------|------|-----------|--------|------------|-------|
| CONTROL                             |      | sPIF      |      | LPS       |        | LPS + sPIF |       |
| Mean                                | SD   | Mean      | SD   | Mean      | SD     | Mean       | SD    |
| 0.3571429                           | 0.04 | 0.2536232 | 0.01 | 0.5741445 | 0.0499 | 0.521605   | 0.031 |

| <b>Pug/Pregnancy Rate</b> |  |         |  |         |  |            |  |
|---------------------------|--|---------|--|---------|--|------------|--|
| CONTROL                   |  | sPIF    |  | LPS     |  | LPS + sPIF |  |
| Percent                   |  | Percent |  | Percent |  | Percent    |  |
| 83.3                      |  | 88.2    |  | 83.3    |  | 88.2       |  |

| <b>Number of Implantations per mouse</b> |    |      |    |      |    |            |    |
|------------------------------------------|----|------|----|------|----|------------|----|
| CONTROL                                  |    | sPIF |    | LPS  |    | LPS + sPIF |    |
| Mean                                     | SD | Mean | SD | Mean | SD | Mean       | SD |
| 13                                       | 2  | 15   | 3  | 12   | 3  | 15         | 1  |

| <b>Relative NALP level</b> |           |           |           |          |           |            |           |
|----------------------------|-----------|-----------|-----------|----------|-----------|------------|-----------|
| CONTROL                    |           | sPIF      |           | LPS      |           | LPS + sPIF |           |
| Mean                       | SD        | Mean      | SD        | Mean     | SD        | Mean       | SD        |
| 1                          | 0.0919449 | 0.8731913 | 0.1141701 | 1.236641 | 0.0208218 | 1.030534   | 0.0990603 |

| <b>Relative ASC level</b> |          |          |           |          |          |            |           |
|---------------------------|----------|----------|-----------|----------|----------|------------|-----------|
| CONTROL                   |          | sPIF     |           | LPS      |          | LPS + sPIF |           |
| Mean                      | SD       | Mean     | SD        | Mean     | SD       | Mean       | SD        |
| 1                         | 0.072396 | 1.169483 | 0.0312596 | 2.197651 | 0.053886 | 1.600503   | 0.0465064 |

| <b>Caspase-1 ng/ml</b> |     |      |     |      |     |            |     |
|------------------------|-----|------|-----|------|-----|------------|-----|
| CONTROL                |     | sPIF |     | LPS  |     | LPS + sPIF |     |
| Mean                   | SD  | Mean | SD  | Mean | SD  | Mean       | SD  |
| 1590                   | 198 | 1547 | 125 | 2319 | 260 | 1885       | 296 |
